# Supplementary material for: Statin therapy in the treatment of active cancer: A systematic review and meta-analysis of randomized controlled trials
Source: PubMed Central journal article supplement (PMC6301687; doi:10.1371/journal.pone.0209486), 2018-12-20
Supplement: pone.0209486.s001.pdf [file pone.0209486.s001.pdf]

Database: OVID Medline Epub Ahead of Print, In-Process & Other Non-Indexed Citations, Ovid MEDLINE(R) Daily and Ovid MEDLINE(R) 1946 to Present  
Search Strategy:

---

- 1 exp Neoplasms/ (3027278)
- 2 neoplas\*.ti,ab,kf. (366529)
- 3 cancer\*.ti,ab,kf. (1511459)
- 4 malignan\*.ti,ab,kf. (507516)
- 5 tumo?r\*.ti,ab,kf. (1497713)
- 6 carcino\*.ti,ab,kf. (724847)
- 7 adenocarcinoma\*.ti,ab,kf. (128964)
- 8 sarcoma\*.ti,ab,kf. (92210)
- 9 adenoma\*.ti,ab,kf. (78517)
- 10 chondrosarcoma\*.ti,ab,kf. (7382)
- 11 fibrosarcoma\*.ti,ab,kf. (11261)
- 12 dermatofibrosarcoma\*.ti,ab,kf. (1758)
- 13 neurofibrosarcoma\*.ti,ab,kf. (402)
- 14 hemangiosarcoma\*.ti,ab,kf. (1002)
- 15 leiomyosarcoma\*.ti,ab,kf. (9566)
- 16 liposarcoma\*.ti,ab,kf. (5808)
- 17 myosarcoma\*.ti,ab,kf. (231)
- 18 rhabdomyosarcoma\*.ti,ab,kf. (11066)
- 19 myxosarcoma\*.ti,ab,kf. (248)
- 20 osteosarcoma\*.ti,ab,kf. (20383)
- 21 lymphoma\*.ti,ab,kf. (161293)
- 22 or/1-21 (3910941)
- 23 exp Hydroxymethylglutaryl-CoA Reductase Inhibitors/ (35923)
- 24 hmg coa.ti,ab,kf. (8109)
- 25 hydroxymethylglutaryl coa.ti,ab,kf. (641)
- 26 hydroxymethylglutaryl-coenzyme.ti,ab,kf. (618)
- 27 (statin or statins).ti,ab,kf. (33545)
- 28 atorvastatin\*.ti,ab,kf. (7486)
- 29 fluvastatin.ti,ab,kf. (1736)
- 30 lovastatin.ti,ab,kf. (3576)
- 31 pitavastatin.ti,ab,kf. (752)
- 32 pravastatin\*.ti,ab,kf. (3856)
- 33 rosuvastatin\*.ti,ab,kf. (2937)
- 34 simvastatin\*.ti,ab,kf. (8502)
- 35 or/23-34 (56163)
- 36 random\*.mp. (1183355)
- 37 RCT\*.mp. (35972)
- 38 exp clinical trial/ or randomized controlled trial/ (792176)
- 39 Random Allocation/ (93718)
- 40 exp clinical trials as topic/ or randomized controlled trials as topic/ (312133)
- 41 double-blind method/ or single-blind method/ (168967)
- 42 ((single or double or triple or treble) adj2 (blind\* or mask\*)).ti,ab,kf. (156401)
- 43 randomized controlled trial.pt. (457171)
- 44 "clinical trial\*".mp. (922729)
- 45 or/36-44 (1767745)
- 46 22 and 35 and 45 (1140)
- 47 animals/ not (humans/ and animals/) (4407637)
- 48 46 not 47 (1068)

\*\*\*\*\*
